# Supplementary material
Source: PubMed Central journal article supplement (PMC8301526)

# Supplementary Figure S1

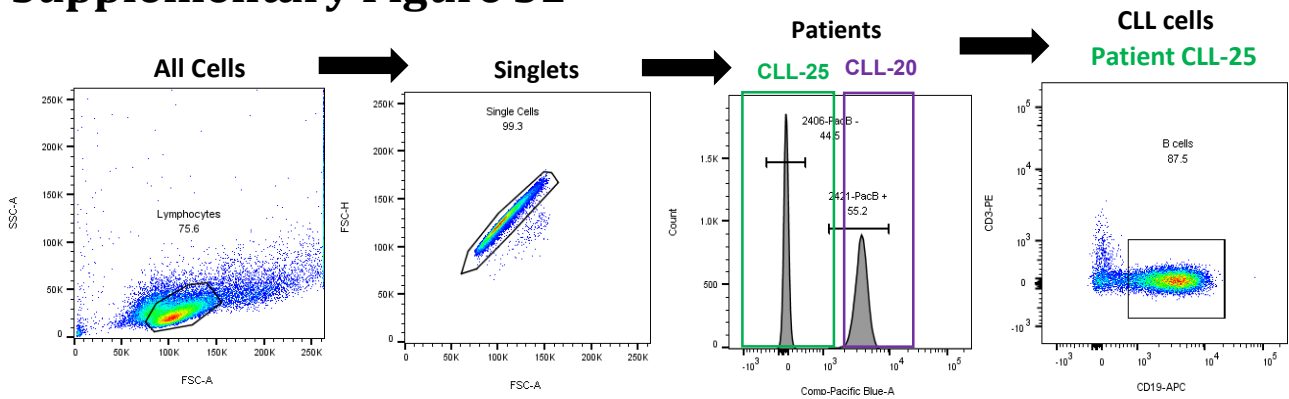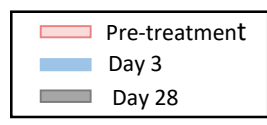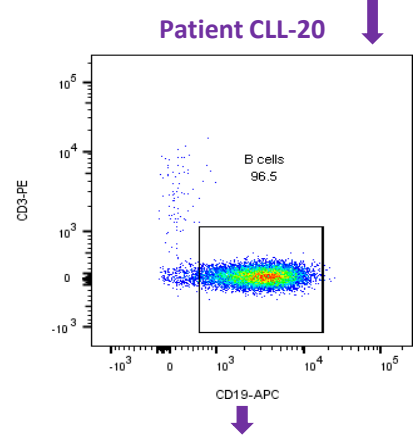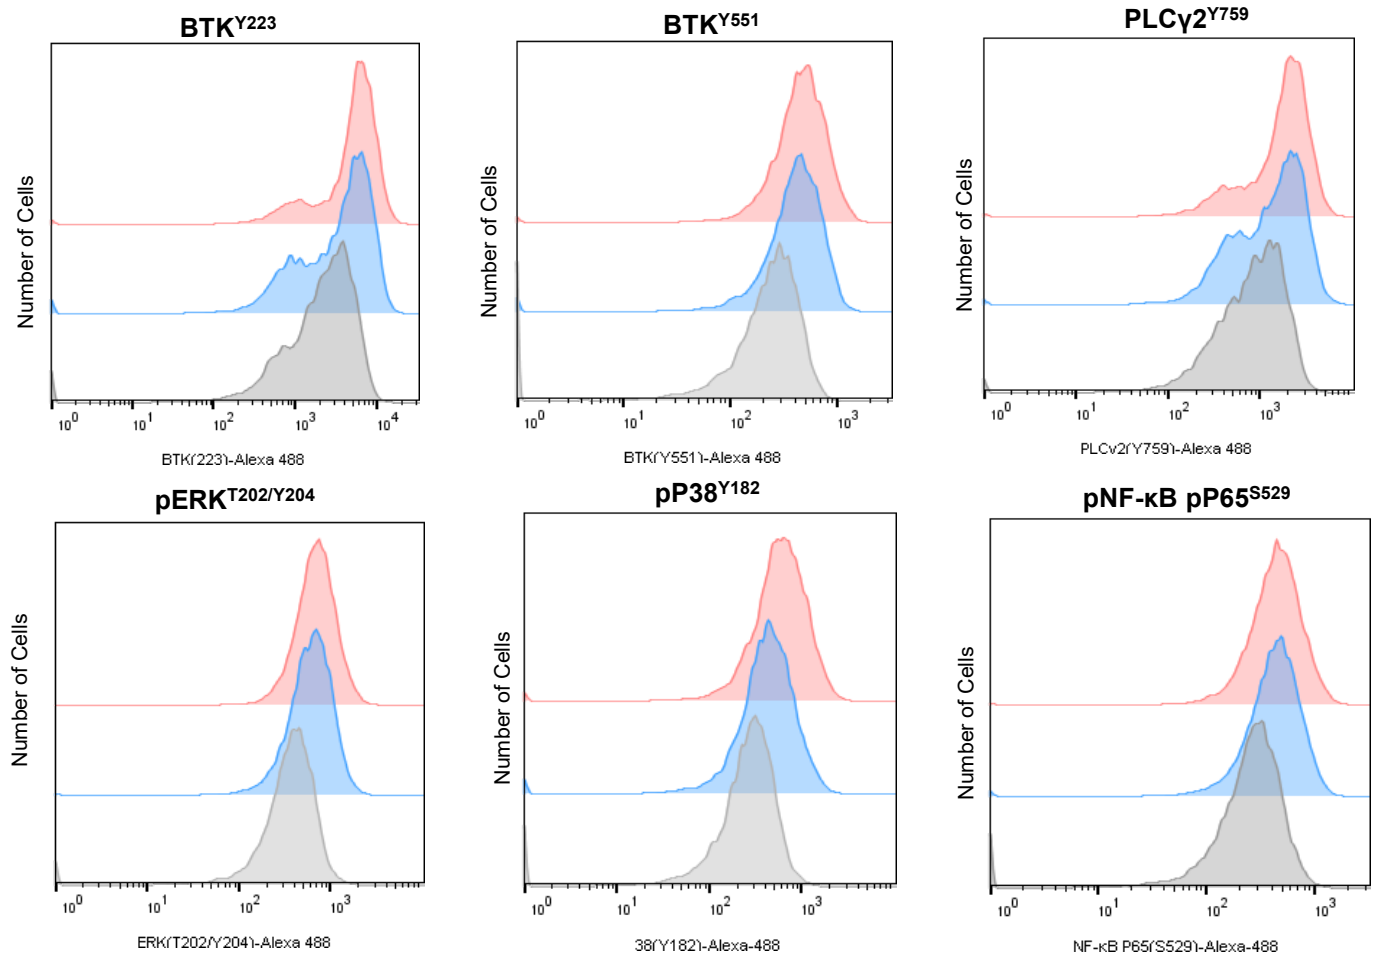

Supplement: NIHMS1562545-supplement-1.pdf [file NIHMS1562545-supplement-1.pdf]

# Supplementary Figure S3

Patient CLL-02

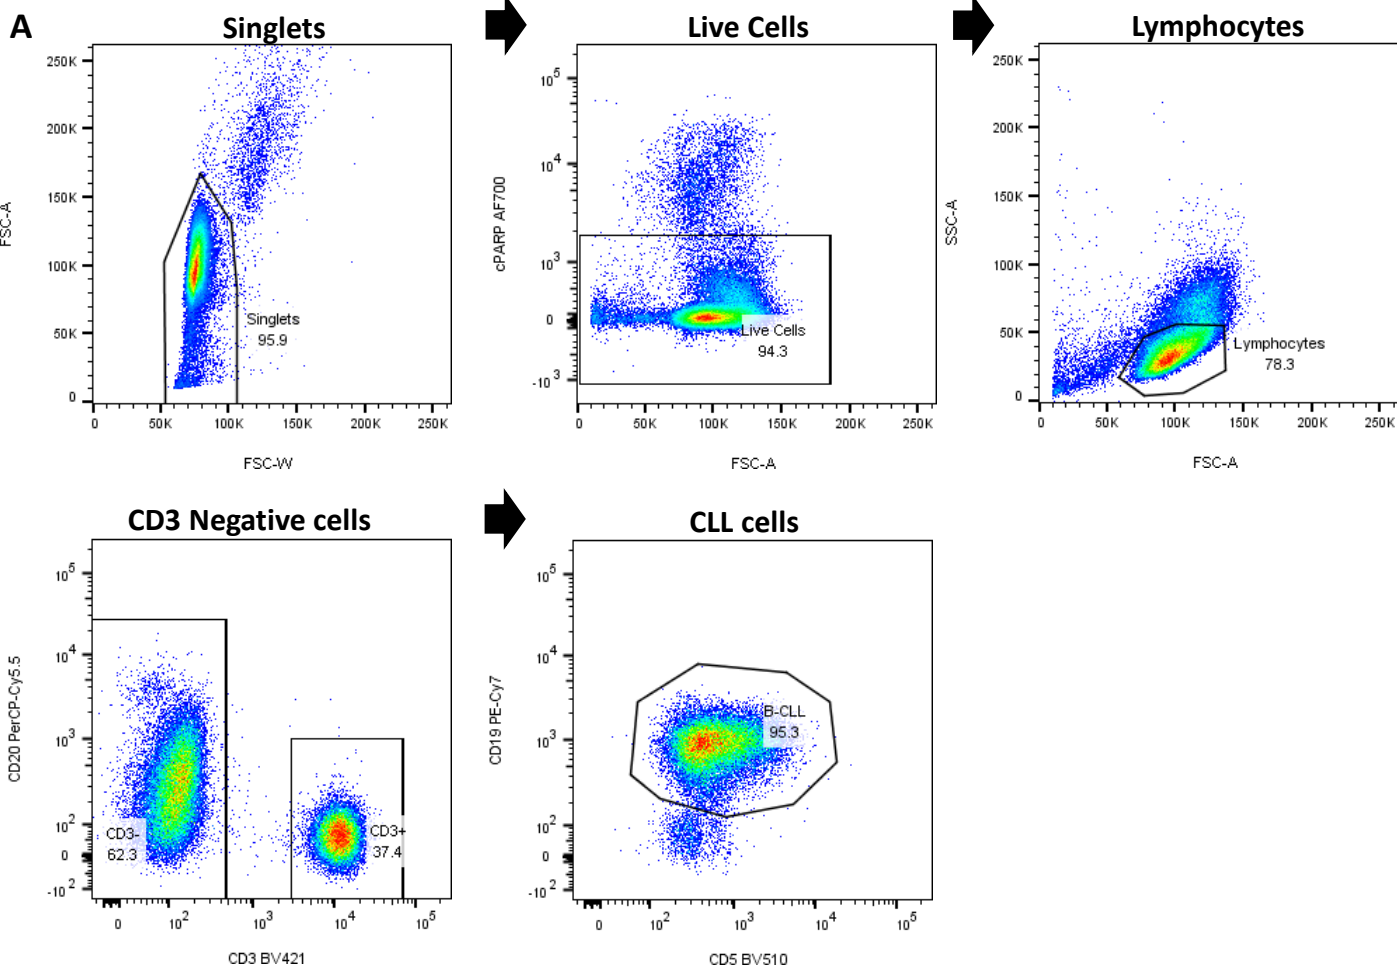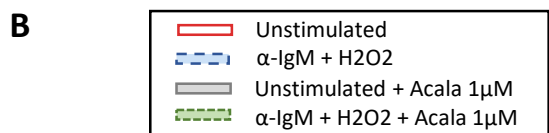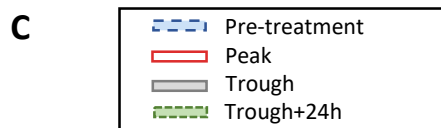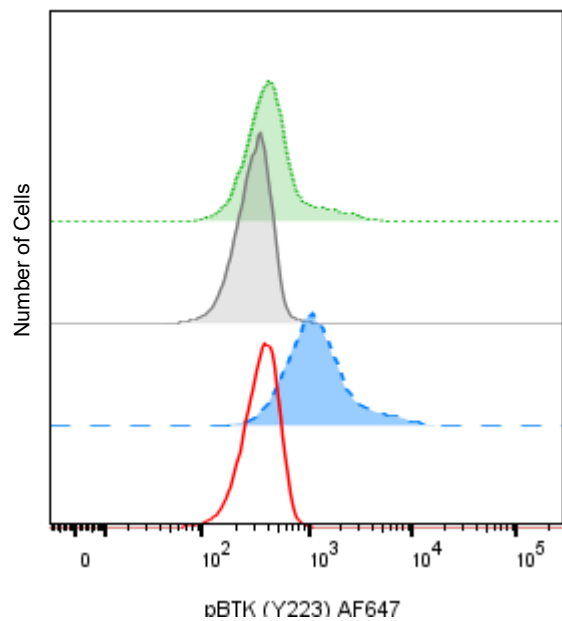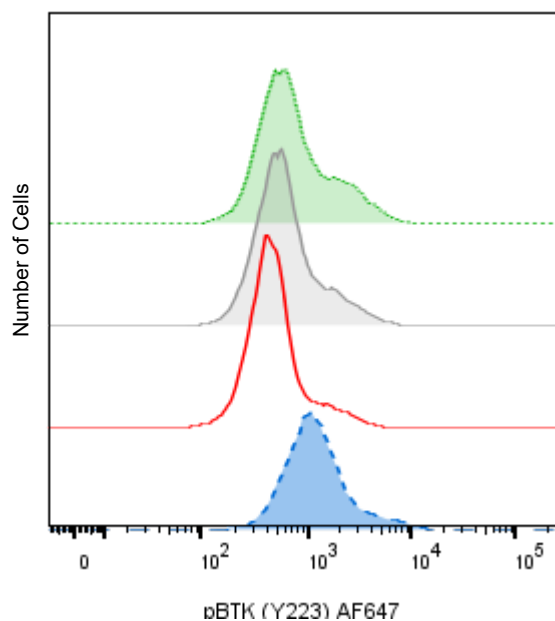

Supplement: NIHMS1562545-supplement-3.pdf [file NIHMS1562545-supplement-3.pdf]

# Supplementary Figure S4

Patient CLL-20

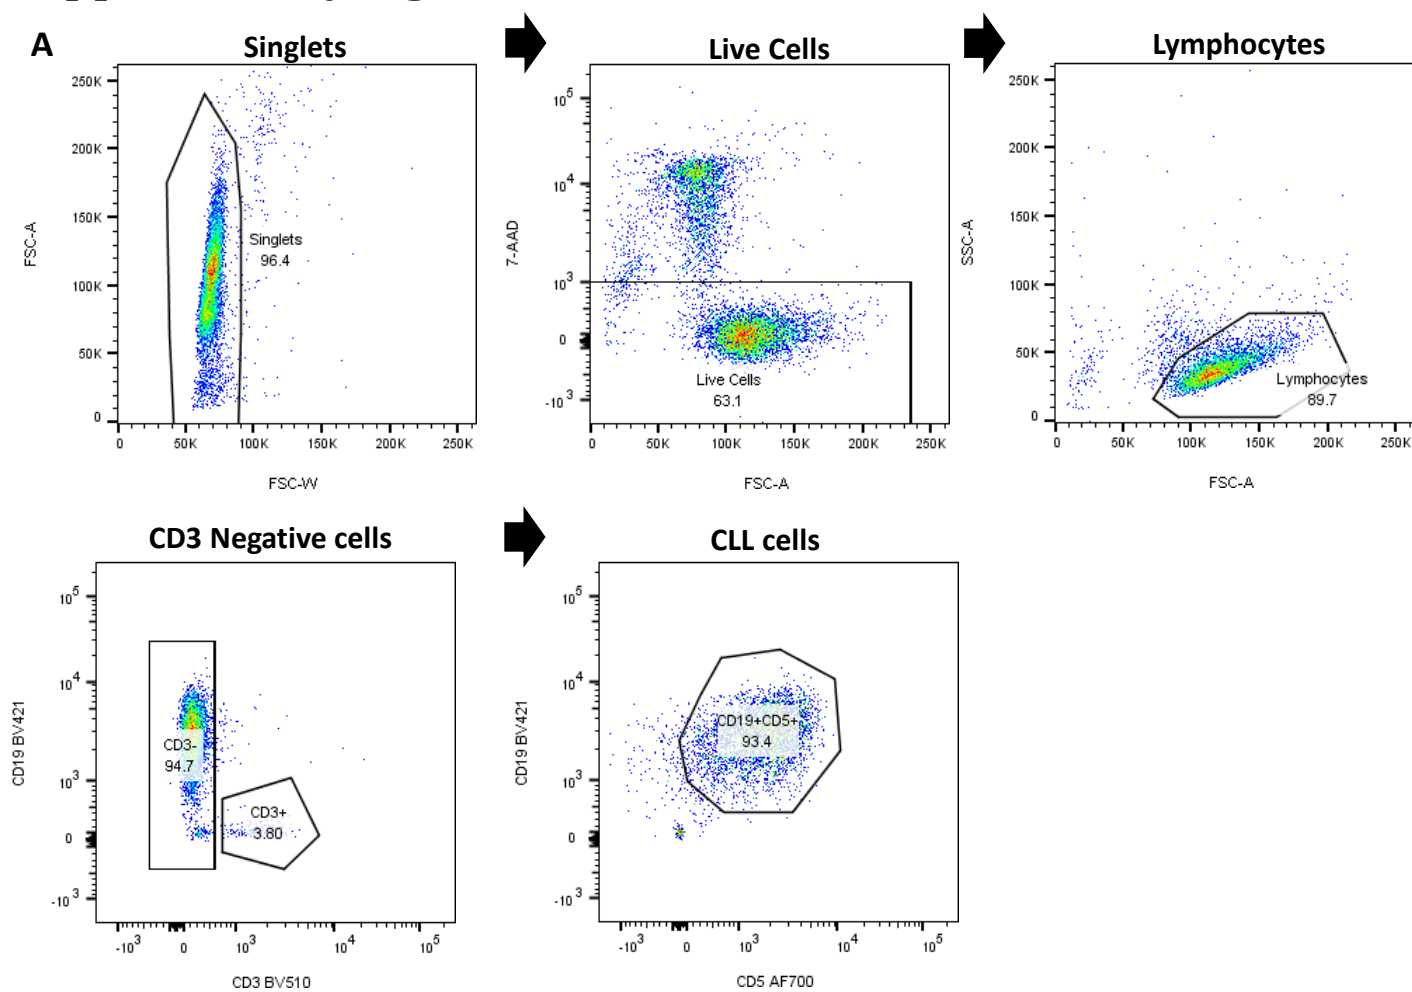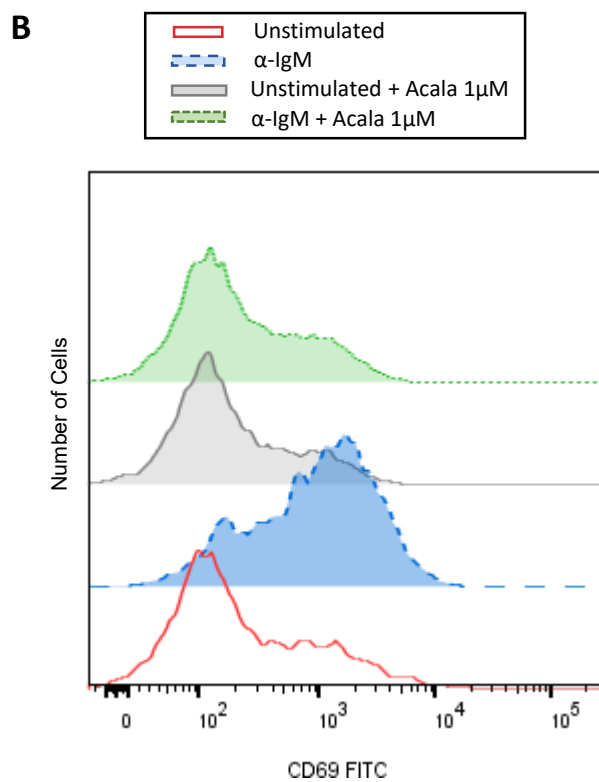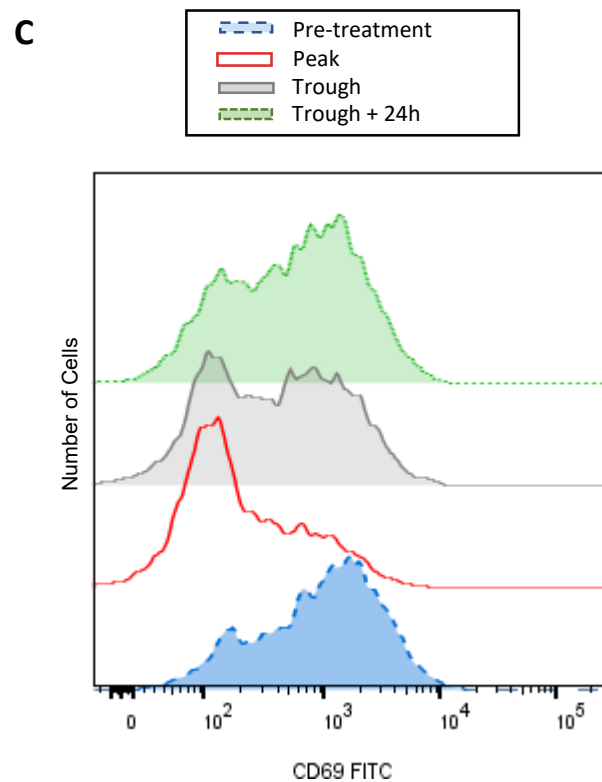

Supplement: NIHMS1562545-supplement-4.pdf [file NIHMS1562545-supplement-4.pdf]

# Supplementary Figure S5

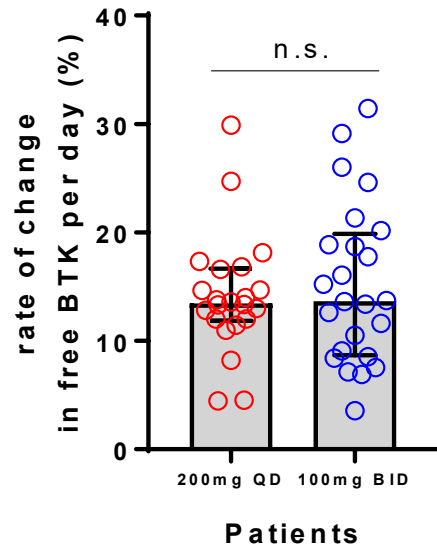

Supplement: NIHMS1562545-supplement-5.pdf [file NIHMS1562545-supplement-5.pdf]
